# Supplementary material
Source: Research Square preprint supplement (doi:10.21203/rs.3.rs-9941824/v1)
Supplement: Supplementary file 1 [file 1b0a93e074cb45fff5e0c7b1.xlsx]

## Sheet: Table_2
Table 2. IOP and BCVA Outcomes by Surgical Group
Table 2a. Wilcoxon signed-rank test: baseline IOP vs. 1-year IOP within each surgical group.
Surgical group	Paired n	Baseline IOP median (IQR)	1-year IOP median (IQR)	Δ median	% reduction	p-value (Wilcoxon)
Phaco (n=21)	16	25.0 (22.5–28.0)	20.0 (14.0–24.5)	−9.0	−38.7%	0.041*
Cx Glaucoma (n=14)	12	18.0 (16.0–32.8)	17.0 (14.5–24.5)	−4.0	−26.4%	0.211
Phaco + Cx Glaucoma (n=5)	5	22.0 (17.0–23.0)	24.0 (16.0–24.5)	+1.5	−6.5%	1.000
Table 2b. Kruskal-Wallis comparison between surgical groups at each time point
Timepoint	H (KW)	p-value	Phaco median	Cx Glc median	Phaco+CxGlc median
Baseline	2.22	0.329	25.0	18.0	22.0
V1 post- Sx	1.23	0.540	21.0	15.0	14.0
3 months	1.41	0.493	18.0	15.0	15.5
6 months	4.77	0.092	21.0	14.0	12.0	†
1 year	0.22	0.894	20.0	17.0	24.0
Phaco = phacoemulsification + IOL; Cx Glaucoma = anti-glaucoma procedure without phacoemulsification (MP-CPC/CPC, trabeculectomy, sclerotomy, GDD); Phaco + CxGlc = combined cataract and anti-glaucoma surgery. Δ = change from baseline; V1 = first post-operative visit; H = Kruskal-Wallis H statistic. † Largest between-group difference observed at this timepoint; did not reach statistical significan…
Table 2c. BCVA Changes After First Surgery (All Operated Eyes)
Wilcoxon signed-rank test vs. baseline. Positive ΔBCVA LogMAR = worsening; negative = improvement.
Comparison	Paired n	Baseline BCVA (median)	Follow-up BCVA (median)	Δ LogMAR (median)	p-value
Baseline → V1 post- Sx	34	0.7	1	+0.30	0.013*
Baseline → 3 months	29	0.7	1	+0.10	0.075
Baseline → 6 months	32	0.7	1	+0.10	0.023*
Baseline → 1 year	35	0.7	0.9	+0.10	0.052
BCVA = best-corrected visual acuity. LogMAR: higher values = worse vision. Early worsening of BCVA is expected following surgery and reflects the inflammatory response and postoperative refractive changes.
