# Supplementary material
Source: Research Square preprint supplement (doi:10.21203/rs.3.rs-9941824/v1)
Supplement: Supplementary file 2 [file 89b74fcadb98ca4907ef49ba.xlsx]

## Sheet: Table_1
Table 1. Demographic and Clinical Characteristics
N = 47 eyes (25 patients). Continuous variables: mean ± SD or median (range). * 4 eyes with missing syndrome data.
Variable	Value / n (%)	n Available
DEMOGRAPHICS (PER PATIENT)
Age at diagnosis (years)	36.6 ± 14.9; median 37 (15–60)	25
Male sex	12 (48%)	25
Female sex	13 (52%)	25
Saudi nationality	25 (100%)	25
Bilateral presentation	22 patients (88%)	25
Unilateral presentation	3 patients (12%)	25
LATERALITY (PER EYE)
Right eye (OD)	22 (47%)	47
Left eye (OS)	25 (53%)	47
GLAUCOMA
Glaucoma type	Angle closure (100%)	47
Uveal effusion / choroidal thickening	32/41 assessed (78%)	41
Associated systemic/ocular syndrome	4 (10%)	43*
Marfan syndrome	2	—
Posterior coloboma	1	—
Keratoconus	1	—
OCULAR BIOMETRY (PER EYE)
Axial length (mm)	16.54 ± 1.53; median 16.09 (14.09–20.38)	41
Anterior chamber depth (mm)	2.31 ± 0.46	26
Mean keratometry (D)	48.64 ± 2.39	39
BASELINE VISUAL ACUITY (PER EYE)
BCVA LogMAR	0.81 ± 0.64; median 0.70 (0.0–2.3)	47
20/20 – 20/40 (good VA)	10 (21%)	47
20/50 – 20/200	27 (57%)	47
20/300 – 20/400	3 (6%)	47
CF / HM / LP (very low VA)	7 (15%)	47
IOP AND OPTIC NERVE (PER EYE)
Baseline IOP (mmHg)	25.0 ± 8.8; median 24 (11–45)	45
Baseline CDR	0.49 ± 0.25; median 0.40 (0.1–1.0)	33
MEDICAL TREATMENT (PER EYE)
On topical anti-glaucoma medication	45 (96%)	47
On systemic acetazolamide	18 (38%)	47
Number of topical medications (median)	3 (range 0–4)	47
PROCEDURES
LPI performed	42 (89%)	47
Surgical intervention (1st)	41 (87%)	47
Phacoemulsification alone	21 (51%)	41
Anti-glaucoma procedure alone	14 (34%)	41
Phaco + anti-glaucoma procedure	5 (12%)	41
Second surgery	18/41 (44%)	41
Cataract surgery (any)	33 (70%)	47
CF = counting fingers; HM = hand motion; LP = light perception; LPI = laser peripheral iridotomy; CDR = cup-to-disc ratio.
