# Supplementary material
Source: Research Square preprint supplement (doi:10.21203/rs.3.rs-9941824/v1)
Supplement: Supplementary file 3 [file b67acabb5f5ac89ba3c4a9c3.xlsx]

## Sheet: Supplementary Table S1
Supplementary Table S1. Spearman rank-order correlation matrix of biometric and clinical variables in nanophthalmos (n per pair shown in parentheses)
Variable	Axial length (mm)	K1 (D)	K2 (D)	ACD (mm)	Baseline IOP (mmHg)	Baseline BCVA (LogMAR)
Axial length (mm)	—
K1 (D)	ρ = -0.611** p = <0.001 n = 37	—
K2 (D)	ρ = -0.715** p = <0.001 n = 37	ρ = +0.729** p = <0.001 n = 39	—
ACD (mm)	ρ = -0.205 p = 0.336 n = 24	ρ = +0.088 p = 0.671 n = 26	ρ = +0.032 p = 0.877 n = 26	—
Baseline IOP (mmHg)	ρ = -0.102 p = 0.536 n = 39	ρ = +0.212 p = 0.208 n = 37	ρ = +0.104 p = 0.539 n = 37	ρ = +0.492* p = 0.011 n = 26	—
Baseline BCVA (LogMAR)	ρ = -0.115 p = 0.474 n = 41	ρ = -0.067 p = 0.686 n = 39	ρ = +0.216 p = 0.187 n = 39	ρ = +0.062 p = 0.762 n = 26	ρ = +0.310* p = 0.038 n = 45	—
Spearman rank-order correlation (ρ). Highlighted cells indicate statistical significance. * p < 0.05; ** p < 0.01. ACD = anterior chamber depth; D = dioptres; IOP = intraocular pressure; K1 = flattest keratometry meridian; K2 = steepest keratometry meridian; LogMAR = logarithm of the minimum angle of resolution; WTW = white-to-white diameter.
